# Supplementary material
Source: PubMed Central journal article supplement (PMC6899008)
Supplement: joces-132-229286-s1.pdf [file joces-132-229286-s1.pdf]

**Table S1. Representative studies using super-resolution microscopy to study TJ organization and dynamics.**

Bold text indicates the cell type, and underlining indicates dynamic events.

| Super-resolution technique                           | Proteins imaged                                                              | Notes                                                                                                                                                                                                                                        | Citation                                           |
|------------------------------------------------------|------------------------------------------------------------------------------|----------------------------------------------------------------------------------------------------------------------------------------------------------------------------------------------------------------------------------------------|----------------------------------------------------|
| Spectral Position Determination Microscopy (SPDM)    | Claudin-3-YFP, claudin-5-YFP                                                 | Reconstituted TJ strands in <b>HEK 293 cells</b> ; reported resolution ~50 nm.                                                                                                                                                               | Kaufmann et al., 2012                              |
| Structured Illumination Microscopy (SIM)             | Actin probe and myosin probe in cells where ZO-1 or afadin were knocked down | Examined junction <u>remodeling</u> and actin connections to the junction especially at tricellular junctions under elevated contractility in <b>MDCK II cells</b> .                                                                         | Choi et al., 2016                                  |
| STochastic Optical Reconstruction Microscopy (STORM) | fixed and stained for claudin-18 and ZO-1                                    | Investigated TJ protein interactions in <b>alveolar epithelial cells</b> .                                                                                                                                                                   | Koval et al., 2016                                 |
| Structured Illumination Microscopy (SIM)             | tagged (GFP, SNAP tag, Halo tag) claudins, ZO-1, and occludin; actin probe   | Reconstituted TJ strands in <b>fibroblast cells</b> ; used SNAP- and Halo-tagged proteins for pulse-chase analysis to determine where newly synthesized TJ proteins <u>dynamically</u> incorporated into strands.                            | Van Itallie et al., 2017; Van Itallie et al., 2019 |
| Structured Illumination Microscopy (SIM)             | Myc-ZO-1-HA                                                                  | Expressed ZO-1 epitope tagged on either end in <b>Eph4 epithelial cells</b> and showed that ZO-1 exhibits tension-dependent <u>conformational changes</u> .                                                                                  | Spadero et al., 2017                               |
| STochastic Optical Reconstruction Microscopy (STORM) | Fixed and stained for claudin-1, claudin-5 or ZO-1                           | Investigated TJ incorporation and morphology in <b>murine brain microvascular endothelial cells</b> when connexin 43 was perturbed (Johnson et al.), or when Claudin-1 was elevated or targeted with a specific peptide (Sladojevic et al.). | Johnson et al., 2018; Sladojevic et al., 2019      |

Bold text indicates the cell type, underlined text indicates dynamic events.

KOVAL, M., MOLINA, S., a SCHLINGMANN, B. 2016. Use of Super-resolution Immunofluorescence Microscopy to Analyze Tight Junction Protein Interactions in situ. *Microscopy and Microanalysis*, 22(S3), 1014-1015.

JOHNSON, A. M., ROACH, J. P., HU, A., STAMATOVIC, S. M., ZOCHOWSKI, M. R., KEEP, R. F. & ANDJELKOVIC, A. V. 2018. Connexin 43 gap junctions contribute to brain endothelial barrier hyperpermeability in familial cerebral cavernous malformations type III by modulating tight junction structure. *FASEB J*, 32, 2615-2629.

SLADOJEVIC, N., STAMATOVIC, S. M., JOHNSON, A. M., CHOI, J., HU, A., DITHMER, S., BLASIG, I. E., KEEP, R. F. & ANDJELKOVIC, A. V. 2019. Claudin-1-Dependent Destabilization of the Blood-Brain Barrier in Chronic Stroke. *J Neurosci*. 39, 743-757.
